# Supplementary material for: Dengue illness impacts daily human mobility patterns in Iquitos, Peru
Source: PubMed Central journal article supplement (PMC6776364; doi:10.1371/journal.pntd.0007756), 2019-09-23
Supplement: pntd.0007756.s002.pdf [file pntd.0007756.s002.pdf]

**S1 Table. Number of participants with data on each day post-symptom onset.** In the bottom section, the number of participants for each 3-day group is given.

|                                  |     |    |     |    |    |     |    |    |              |              |
|----------------------------------|-----|----|-----|----|----|-----|----|----|--------------|--------------|
| Day post symptom onset           | 1   | 2  | 3   | 4  | 5  | 6   | 7  | 8  | 9            | Post-illness |
| Number of participants with data | 21  | 33 | 45  | 51 | 48 | 47  | 45 | 45 | 28           | 34           |
| Day post symptom onset           | 1-3 |    | 4-6 |    |    | 7-9 |    |    | Post-illness |              |
| Number of participants with data | 46  |    | 54  |    |    | 49  |    |    | 34           |              |
