# Supplementary material for: Dengue illness impacts daily human mobility patterns in Iquitos, Peru
Source: PubMed Central journal article supplement (PMC6776364; doi:10.1371/journal.pntd.0007756), 2019-09-23
Supplement: pntd.0007756.s003.pdf [file pntd.0007756.s003.pdf]

**S2 Table. Results of pairwise Wilcoxon Sign Rank tests of paired data for time points pre-, during, and post-illness.** Tests were performed for number of locations visited, number of houses visited, and proportion of time spent at home, comparing between three time points: pre-, during, and post-illness. (\*  $p < 0.05$ , \*\*  $p < 0.01$ , \*\*\* $p < 0.001$ ).

| <b>Outcome Variable</b> | <b>Time point 1</b>       | <b>Time point 2</b> | <b>p-value</b> |
|-------------------------|---------------------------|---------------------|----------------|
| Locations visited       | During Illness (Days 1-9) | Pre-illness         | < 0.001 ***    |
| Locations visited       | During Illness (Days 1-9) | Post-illness        | 0.010 *        |
| Locations visited       | Pre-illness               | Post-illness        | 1.000          |
| Houses visited          | During Illness (Days 1-9) | Pre-illness         | < 0.001 ***    |
| Houses visited          | During Illness (Days 1-9) | Post-illness        | 0.093          |
| Houses visited          | Pre-illness               | Post-illness        | 1.000          |
| Time spent at home      | During Illness (Days 1-9) | Pre-illness         | < 0.001 ***    |
| Time spent at home      | During Illness (Days 1-9) | Post-illness        | < 0.001 ***    |
| Time spent at home      | Pre-illness               | Post-illness        | 1.000          |
