# Supplementary material for: Dengue illness impacts daily human mobility patterns in Iquitos, Peru
Source: PubMed Central journal article supplement (PMC6776364; doi:10.1371/journal.pntd.0007756), 2019-09-23
Supplement: pntd.0007756.s004.pdf [file pntd.0007756.s004.pdf]

**S3 Table. Results of McNemar's  $\chi^2$  test for time points pre-, during, and post-illness.** Tests were performed for number of locations visited, number of houses visited, and proportion of time spent at home, comparing between three time points: pre-, during, and post-illness. (\* p<0.05, \*\* p<0.01, \*\*\*p<0.001).

| <b>Outcome Variable</b> | <b>Time point 1</b>       | <b>Time point 2</b> | <b><math>\chi^2</math> score</b> | <b>p-value</b> |
|-------------------------|---------------------------|---------------------|----------------------------------|----------------|
| Locations visited       | During Illness (Days 1-9) | Pre-illness         | 5.82                             | 0.016 *        |
| Locations visited       | During Illness (Days 1-9) | Post-illness        | 3.2                              | 0.074          |
| Locations visited       | Pre-illness               | Post-illness        | 0.5                              | 0.480          |
| Houses visited          | During Illness (Days 1-9) | Pre-illness         | 20.35                            | < 0.001 ***    |
| Houses visited          | During Illness (Days 1-9) | Post-illness        | 4.08                             | 0.043 *        |
| Houses visited          | Pre-illness               | Post-illness        | 0.1                              | 0.752          |
| Time spent at home      | During Illness (Days 1-9) | Pre-illness         | 5.82                             | 0.016 *        |
| Time spent at home      | During Illness (Days 1-9) | Post-illness        | 3.2                              | 0.074          |
| Time spent at home      | Pre-illness               | Post-illness        | 0                                | 1              |
