# Supplementary material for: Dengue illness impacts daily human mobility patterns in Iquitos, Peru
Source: PubMed Central journal article supplement (PMC6776364; doi:10.1371/journal.pntd.0007756), 2019-09-23
Supplement: pntd.0007756.s005.pdf [file pntd.0007756.s005.pdf]

**S4 Table. Mean predicted probability of a specific location type being visited throughout illness.** Probabilities are predicted for pre-, during, and post-illness time periods, based on logistic GLMMs. For houses, the probabilities are predicted for visiting family member's houses (vs friend's houses) (Table 1).

|                       | <b>Pre-illness<br/>(Day 0)</b> | <b>Post-illness<br/>(Day 30)</b> | <b>During Illness<br/>(Daily)</b> |
|-----------------------|--------------------------------|----------------------------------|-----------------------------------|
| <b>Education/Work</b> | 0.345                          | 0.517                            | 0.243                             |
| <b>Health</b>         | 0.017                          | 0.001                            | 0.316                             |
| <b>Other</b>          | 0.326                          | 0.273                            | 0.255                             |
| <b>House</b>          | 0.304                          | 0.207                            | 0.178                             |
| <b>Family's House</b> | 0.55                           | 0.46                             | 0.67                              |
