# Supplementary material for: Dengue illness impacts daily human mobility patterns in Iquitos, Peru
Source: PubMed Central journal article supplement (PMC6776364; doi:10.1371/journal.pntd.0007756), 2019-09-23
Supplement: pntd.0007756.s006.pdf [file pntd.0007756.s006.pdf]

**S5 Table. Results of pairwise Wilcoxon Sign Rank tests of paired data for time points during illness.** Tests were performed for number of locations visited, number of houses visited, and proportion of time spent at home, comparing between post-illness and three time points during illness (days 1-3, 4-6, 7-9). (\* p<0.05, \*\* p<0.01, \*\*\*p<0.001).

| <b>Outcome Variable</b> | <b>Time point 1</b> | <b>Time point 2</b> | <b>p-value</b> |
|-------------------------|---------------------|---------------------|----------------|
| Locations visited       | Days 1-3            | Post-illness        | 0.0170 *       |
| Locations visited       | Days 4-6            | Post-illness        | < 0.001 ***    |
| Locations visited       | Days 7-9            | Post-illness        | 0.123          |
| Locations visited       | Days 1-3            | Days 4-6            | 1.000          |
| Locations visited       | Days 1-3            | Days 7-9            | 0.047 *        |
| Locations visited       | Days 4-6            | Days 7-9            | 0.871          |
| Houses visited          | Days 1-3            | Post-illness        | 0.628          |
| Houses visited          | Days 4-6            | Post-illness        | 0.148          |
| Houses visited          | Days 7-9            | Post-illness        | 0.722          |
| Houses visited          | Days 1-3            | Days 4-6            | 1.000          |
| Houses visited          | Days 1-3            | Days 7-9            | 0.289          |
| Houses visited          | Days 4-6            | Days 7-9            | 1.000          |
| Time spent at home      | Days 1-3            | Post-illness        | 0.005 **       |
| Time spent at home      | Days 4-6            | Post-illness        | < 0.001 ***    |
| Time spent at home      | Days 7-9            | Post-illness        | 0.308          |
| Time spent at home      | Days 1-3            | Days 4-6            | 1.000          |
| Time spent at home      | Days 1-3            | Days 7-9            | 0.014 *        |
| Time spent at home      | Days 4-6            | Days 7-9            | 0.008 **       |
