# Supplementary material for: Dengue illness impacts daily human mobility patterns in Iquitos, Peru
Source: PubMed Central journal article supplement (PMC6776364; doi:10.1371/journal.pntd.0007756), 2019-09-23
Supplement: pntd.0007756.s007.pdf [file pntd.0007756.s007.pdf]

**S6 Table. Results of McNemar's  $\chi^2$  test for time points during illness.** Tests were performed for number of locations visited, number of houses visited, and proportion of time spent at home, comparing between four time points: days 1-3, 4-6, 7-9, and post-illness. (\* p<0.05, \*\* p<0.01, \*\*\*p<0.001).

| <b>Outcome Variable</b> | <b>Time point 1</b> | <b>Time point 2</b> | <b><math>\chi^2</math> score</b> | <b>p-value</b> |
|-------------------------|---------------------|---------------------|----------------------------------|----------------|
| Locations visited       | Days 1-3            | Post-illness        | 10.08                            | 0.001 **       |
| Locations visited       | Days 4-6            | Post-illness        | 11.08                            | < 0.001 ***    |
| Locations visited       | Days 7-9            | Post-illness        | 7.11                             | 0.008 **       |
| Locations visited       | Days 1-3            | Days 4-6            | 0                                | 1.000          |
| Locations visited       | Days 1-3            | Days 7-9            | 3.06                             | 0.080          |
| Locations visited       | Days 4-6            | Days 7-9            | 2.08                             | 0.149          |
| Houses visited          | Days 1-3            | Post-illness        | 2.29                             | 0.131          |
| Houses visited          | Days 4-6            | Post-illness        | 2.5                              | 0.114          |
| Houses visited          | Days 7-9            | Post-illness        | 0.44                             | 0.505          |
| Houses visited          | Days 1-3            | Days 4-6            | 0                                | 1.000          |
| Houses visited          | Days 1-3            | Days 7-9            | 5.14                             | 0.023 *        |
| Houses visited          | Days 4-6            | Days 7-9            | 3.2                              | 0.074          |
| Time spent at home      | Days 1-3            | Post-illness        | 7.11                             | 0.008 **       |
| Time spent at home      | Days 4-6            | Post-illness        | 7.11                             | 0.008 **       |
| Time spent at home      | Days 7-9            | Post-illness        | 3.2                              | 0.074          |
| Time spent at home      | Days 1-3            | Days 4-6            | 0                                | 1.000          |
| Time spent at home      | Days 1-3            | Days 7-9            | 4                                | 0.046 *        |
| Time spent at home      | Days 4-6            | Days 7-9            | 2.5                              | 0.114          |
