# Supplementary material for: Dengue illness impacts daily human mobility patterns in Iquitos, Peru
Source: PubMed Central journal article supplement (PMC6776364; doi:10.1371/journal.pntd.0007756), 2019-09-23
Supplement: pntd.0007756.s008.pdf [file pntd.0007756.s008.pdf]

**S7 Table. Mean predicted probability of a specific location type being visited during illness.** Probabilities are predicted for time points during illness and post-illness, based on logistic GLMMs. For houses, the probabilities are predicted for visiting family member's houses (vs friend's houses) (Table 2).

|                       | <b>Days 1-3</b> | <b>Days 4-6</b> | <b>Days 7-9</b> | <b>Post-Illness<br/>(Day 30)</b> |
|-----------------------|-----------------|-----------------|-----------------|----------------------------------|
| <b>Education/Work</b> | 0.165           | 0.244           | 0.278           | 0.479                            |
| <b>Health</b>         | 0.467           | 0.353           | 0.177           | 0.002                            |
| <b>Other</b>          | 0.200           | 0.208           | 0.323           | 0.315                            |
| <b>House</b>          | 0.138           | 0.175           | 0.193           | 0.200                            |
| <b>Family's House</b> | 0.71            | 0.67            | 0.65            | 0.46                             |
