# Supplementary material for: Dengue illness impacts daily human mobility patterns in Iquitos, Peru
Source: PubMed Central journal article supplement (PMC6776364; doi:10.1371/journal.pntd.0007756), 2019-09-23
Supplement: pntd.0007756.s009.pdf [file pntd.0007756.s009.pdf]

**S8 Table. Results from likelihood ratio tests between pairs of GLMMs of total number of locations visited with various explanatory variables.** The Chi square test statistic is looking at the reduction in deviance for each model as compared to GLMM(day). AICs are also provided for each model. The best-fit model is highlighted in red.

| MODEL                | DF | AIC | Deviance | Chisq | Pr(>Chi) |
|----------------------|----|-----|----------|-------|----------|
| GLMM(day)            | 3  | 368 | 362.25   |       |          |
| GLMM(qwb_score)      | 3  | 372 | 365.72   | 0     | 1        |
| GLMM(day, qwb_score) | 4  | 369 | 360.71   | 1.55  | 0.21     |
| GLMM(day*qwb_score)  | 5  | 370 | 360.45   | 1.81  | 0.41     |
