# Supplementary material for: Dengue illness impacts daily human mobility patterns in Iquitos, Peru
Source: PubMed Central journal article supplement (PMC6776364; doi:10.1371/journal.pntd.0007756), 2019-09-23
Supplement: pntd.0007756.s010.pdf [file pntd.0007756.s010.pdf]

**S9 Table. Table comparing additive regression models for total number of locations visited with various explanatory variables.** AIC values, degrees of freedom (DF), and amount of deviance explained (%) are provided for each model. The best-fit model is highlighted in red.

| MODEL                                           | DF | AIC | Deviance Explained (%) |
|-------------------------------------------------|----|-----|------------------------|
| <b>GAMM(day)</b>                                | 3  | 532 | <b>1.26 %</b>          |
| GAMM(s(day),s(qwb_score),<br>ti(qwb_score,day)) | 7  | 538 | 2.65%                  |
| GAMM(te(qwb_score,day))                         | 7  | 538 | 3.87%                  |
