# Supplementary material for: Dengue illness impacts daily human mobility patterns in Iquitos, Peru
Source: PubMed Central journal article supplement (PMC6776364; doi:10.1371/journal.pntd.0007756), 2019-09-23
Supplement: pntd.0007756.s011.pdf [file pntd.0007756.s011.pdf]

**S10 Table. Fixed effects of the best-fit model for total number of locations visited:  
GLMM “Total Locations ~ day”.**

|           | Estimate | Std. Error | t value | p-value  |
|-----------|----------|------------|---------|----------|
| Intercept | -0.898   | 0.274      | -3.28   | 0.001 ** |
| day       | 0.077    | 0.041      | 1.86    | 0.063    |
