# Supplementary material for: Dengue illness impacts daily human mobility patterns in Iquitos, Peru
Source: PubMed Central journal article supplement (PMC6776364; doi:10.1371/journal.pntd.0007756), 2019-09-23
Supplement: pntd.0007756.s012.pdf [file pntd.0007756.s012.pdf]

**S11 Table. Results from likelihood ratio tests between pairs of GLMMs of total number of houses visited with various explanatory variables.** The Chi square test statistic is looking at the reduction in deviance for each model as compared to GLMM(day). AICs are also provided for each model. The best-fit model is highlighted in red.

| MODEL                | DF | AIC | Deviance | Chisq | Pr(>Chi) |
|----------------------|----|-----|----------|-------|----------|
| GLMM(day)            | 3  | 103 | 96.72    |       |          |
| GLMM(qwb_score)      | 3  | 104 | 97.91    | 0     | 1        |
| GLMM(day, qwb_score) | 4  | 105 | 96.59    | 0.133 | 0.715    |
| GLMM(day*qwb_score)  | 5  | 105 | 94.65    | 2.067 | 0.356    |
