# Supplementary material for: Dengue illness impacts daily human mobility patterns in Iquitos, Peru
Source: PubMed Central journal article supplement (PMC6776364; doi:10.1371/journal.pntd.0007756), 2019-09-23
Supplement: pntd.0007756.s013.pdf [file pntd.0007756.s013.pdf]

**S12 Table. Table comparing additive regression models for total number of houses visited with various explanatory variables.** AIC values, degrees of freedom (DF), and amount of deviance explained (%) are provided for each model. The best-fit model is highlighted in red.

| MODEL                   | DF | AIC | Deviance Explained (%) |
|-------------------------|----|-----|------------------------|
| MODEL                   | DF | AIC | Deviance Explained (%) |
| <b>GAMM(day)</b>        | 3  | 841 | 1.26 %                 |
| GAMM(te(qwb_score,day)) | 7  | 853 | 2.52%                  |
