# Supplementary material for: Dengue illness impacts daily human mobility patterns in Iquitos, Peru
Source: PubMed Central journal article supplement (PMC6776364; doi:10.1371/journal.pntd.0007756), 2019-09-23
Supplement: pntd.0007756.s014.pdf [file pntd.0007756.s014.pdf]

**S13 Table. Fixed effects of the best-fit model for total number of houses visited:  
GLMM “Total Houses ~ day”.**

|           | Estimate | Std. Error | z value | p-value     |
|-----------|----------|------------|---------|-------------|
| Intercept | -8.457   | 2.083      | -4.061  | < 0.001 *** |
| day       | 0.171    | 0.010      | 1.718   | 0.086       |
